# Supplementary material
Source: PubMed Central journal article supplement (PMC6643947)
Supplement: ao7b01221_si_001.pdf [file ao7b01221_si_001.pdf]

# Scarless Wound Closure by Mussel-Inspired Poly(amidoamine) Tissue Adhesive with Tunable Degradability

Bo Peng,<sup>1,3</sup> Xinyi Lai,<sup>1</sup> Lei Chen,<sup>2</sup> Xuemei Lin,<sup>1</sup> Chengxin Sun,<sup>1</sup> Lixin Liu,<sup>1,\*</sup> Shaohai Qi,<sup>2,\*</sup> Yongming Chen,<sup>1,\*</sup> Kam W. Leong<sup>3</sup>

<sup>1</sup> Center of Functional Biomaterials, School of Material Science and Engineering, Sun Yat-sen University; Key Laboratory for Polymeric Composite and Functional Materials of Ministry of Education, Sun Yat-sen University, Guangzhou 510275, Guangdong, China

<sup>2</sup> Department of Burns Surgery, The First Affiliated Hospital of Sun Yat-sen University, Guangzhou 510080, Guangdong, China

<sup>3</sup> Department of Biomedical Engineering, Columbia University, New York, NY 10025, USA

**KEYWORDS:** Adhesive; Dopamine; Poly(amidoamine); Wound healing; Zwitterionic polymer

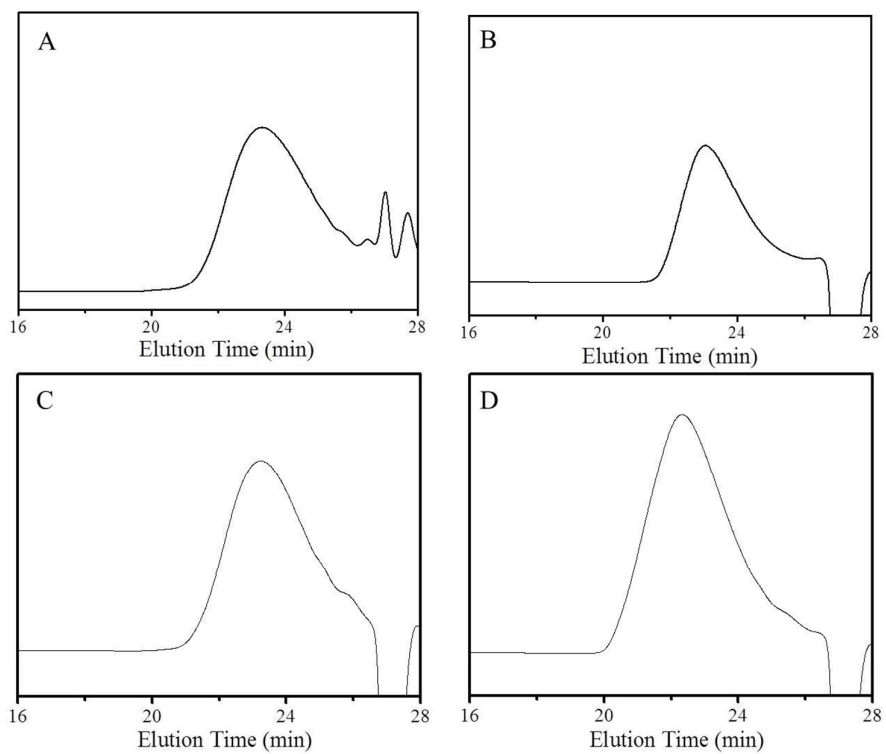

**Figure S1.** SEC traces of (A) CPAA, (B) CPAE-1, (C) CPAE-2 and (D) CPAE-3 in DMF.

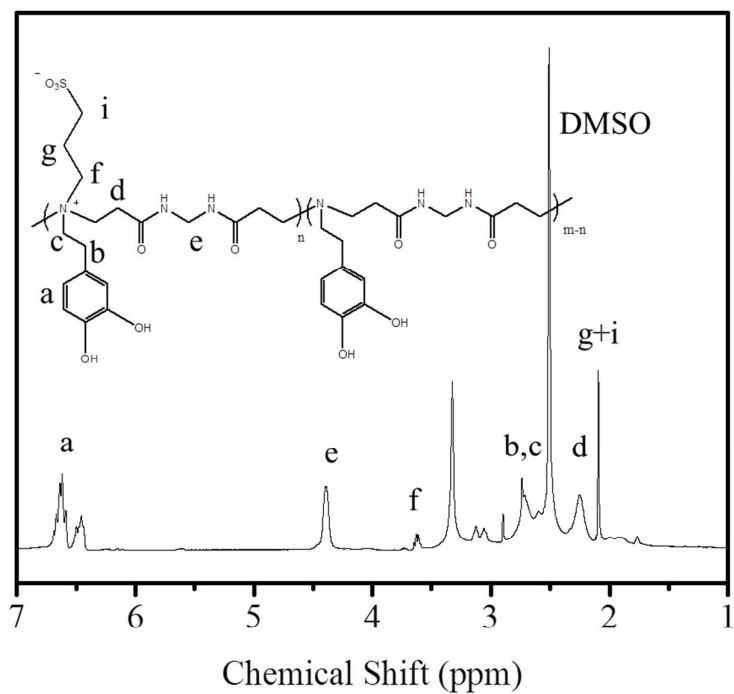

**Figure S2.**  $^1\text{H}$  NMR spectrum of CPAA-ZS-53 in  $\text{DMSO-d}_6$ .

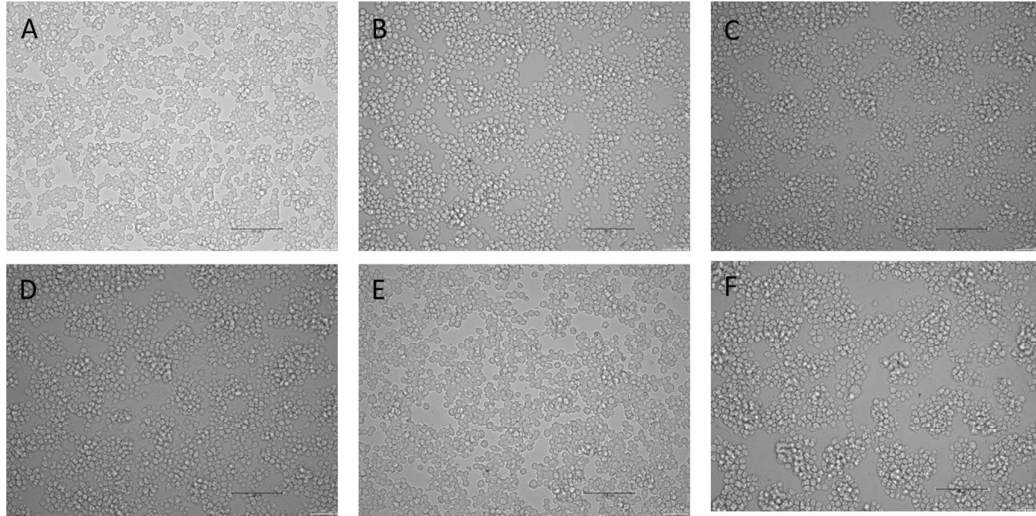

**Figure S3.** Microscope images of RAW264.7 cells grew on (A) CPAA-ZS-11; (B) CPAA-ZS-15; (C) CPAA-ZS-18; (D)CPAA-ZS-21; (E) CPAA-ZS-34; (F) CPAA-ZS-53 coated 24-well plate.
